# Supplementary material for: Evaluation of Outcomes following Reduction in Targeted Fluid Administration in Major Burns
Source: MDPI journal article supplement (doi:10.3390/ebj4020021), 2023-05-29
Supplement: s1 [file s1]

Figure S1. Fluid distribution by weight.

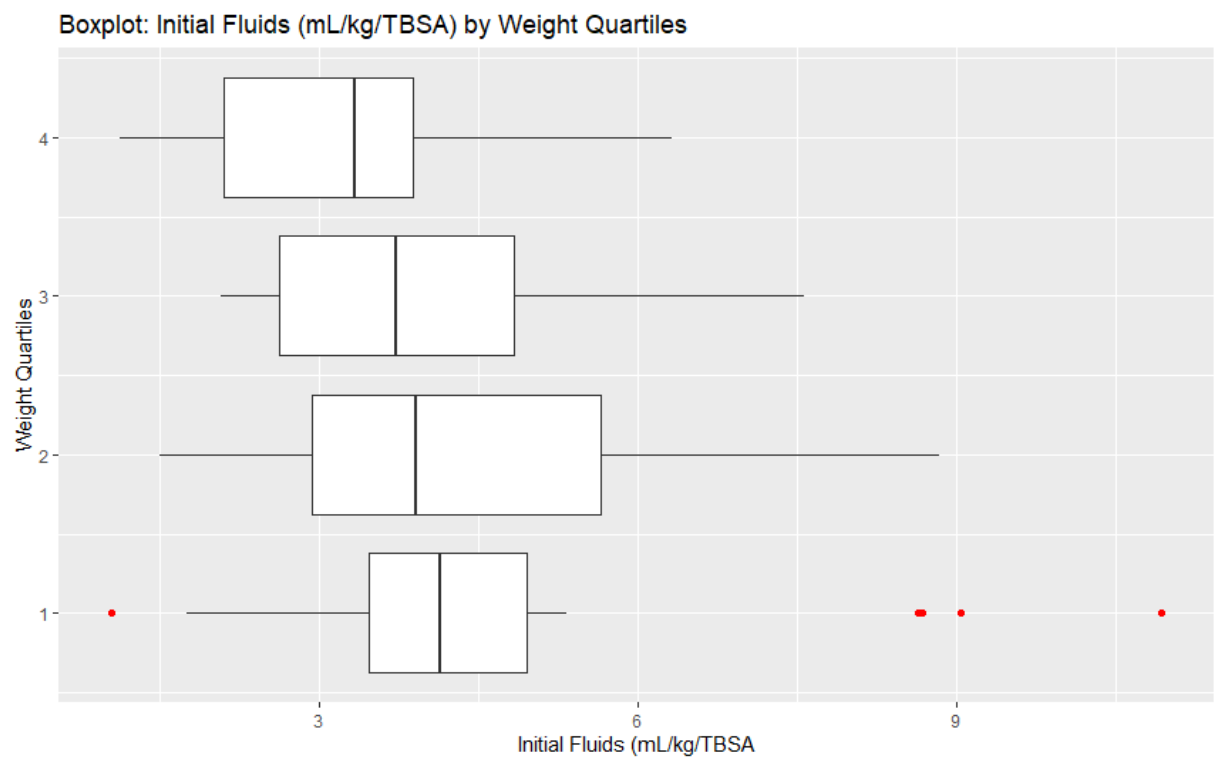

Table S1. Mortality Analysis Logistic Regression.

| Feature                     | Odds Ratio | p-value |
|-----------------------------|------------|---------|
| Age                         | 1.11       | < 0.001 |
| TBSA                        | 1.09       | < 0.001 |
| After change in fluid goals | 1.76       | 0.44    |

| Feature                            | Odds Ratio | p-value |
|------------------------------------|------------|---------|
| Age                                | 1.12       | < 0.001 |
| TBSA                               | 1.09       | < 0.001 |
| After change in fluid goals        | 1.66       | 0.49    |
| First 24-hour intake as mL/kg/TBSA | 0.86       | 0.44    |

**Table S2.** Survival Analysis Cox Proportional Hazards.

| Feature                     | Odds Ratio | <i>p</i> -value |
|-----------------------------|------------|-----------------|
| Age                         | 1.09       | < 0.001         |
| TBSA                        | 1.08       | < 0.001         |
| After change in fluid goals | 1.21       | 0.72            |

| Feature                            | Odds Ratio | <i>p</i> -value |
|------------------------------------|------------|-----------------|
| Age                                | 1.1        | < 0.001         |
| TBSA                               | 1.08       | < 0.001         |
| After change in fluid goals        | 1.17       | 0.77            |
| First 24 hour intake as mL/kg/TBSA | 0.83       | 0.22            |

**Table S3.** ARDS Development Logistic Regression.

| Feature                     | Odds Ratio | <i>p</i> -value |
|-----------------------------|------------|-----------------|
| Age                         | 1.03       | 0.1             |
| TBSA                        | 1.03       | 0.03            |
| After change in fluid goals | 2.56       | 0.12            |

| Feature                            | Odds Ratio | <i>p</i> -value |
|------------------------------------|------------|-----------------|
| Age                                | 1.02       | 0.18            |
| TBSA                               | 1.03       | 0.02            |
| After change in fluid goals        | 2.81       | 0.1             |
| First 24 hour intake as mL/kg/TBSA | 1.18       | 0.28            |

AKI in First 7 Days Logistic Regression.

| Feature                     | Odds Ratio | <i>p</i> -value |
|-----------------------------|------------|-----------------|
| Age                         | 1.04       | < 0.01          |
| TBSA                        | 1.05       | < 0.001         |
| After change in fluid goals | 0.55       | 0.23            |

| Feature                            | Odds Ratio | <i>p</i> -value |
|------------------------------------|------------|-----------------|
| Age                                | 1.04       | < 0.01          |
| TBSA                               | 1.05       | < 0.01          |
| After change in fluid goals        | 0.54       | 0.1             |
| First 24 hour intake as mL/kg/TBSA | 0.94       | 0.28            |
